# Supplementary material
Source: HighWire-hosted journal article supplement (https://cmaj.ca/highwire/filestream/58768/field_highwire_adjunct_files/0/tract-dubrovsky-1-at.pdf)

**Appendix 1 (as supplied by the authors): Three-point scale used to determine degree of visibility of the urethral meatus in uncircumcised boys.** Reproduced with permission from Marques TC, Sampaio FJ, Favorito LA. *Int Braz J Urol* 2005;31:370-4.

**Non-Visible**

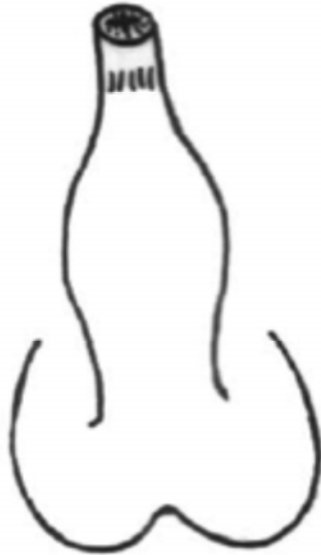

**Partially Visible**

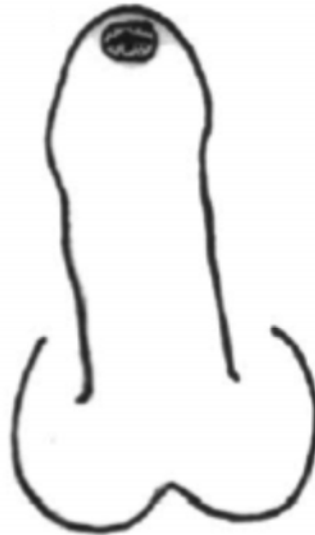

**Completely Visible**

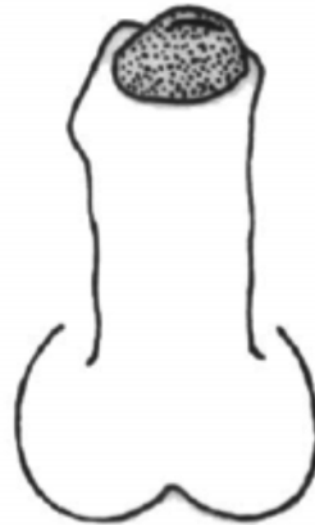

Supplement: tract-dubrovsky-1-at.pdf [file tract-dubrovsky-1-at.pdf]
